# Supplementary material for: Gut Microbiome Composition and Metabolic Status Are Differently Affected by Early Exposure to Unhealthy Diets in a Rat Model
Source: Nutrients. 2021 Sep 17;13(9):3236. doi: 10.3390/nu13093236 (PMC8469890; doi:10.3390/nu13093236)
Supplement: Supplementary file 1 [file nutrients-13-03236-s001.zip › supplemental table 1 and 2.pdf]

## Supplement 1.

**Table S1. Composition of the intervention diets**

At 4 weeks of age, rats (CD) were fed with standard chow diet (Mucedola, Milan, Italy) and water; high-sugar diet (HSD) group were fed with standard chow diet and a solution of 30% sucrose (Sigma-Aldrich Company Ltd., Madrid, Spain; 1.2 Kcal/mL); cafeteria diet (CAFD) group were fed with standard chow diet plus a mix of palatable foods (chocolate cake, biscuits, dog roll and a high-fat rat chow) and a solution of 15% sucrose (Sigma-Aldrich Company Ltd., Madrid, Spain; 0.6 Kcal/mL).

| Compositions                          | CD          | HSD                               | CAFD                               |
|---------------------------------------|-------------|-----------------------------------|------------------------------------|
|                                       | (chow diet) | (chow diet +<br>sucrose solution) | (mixed food +<br>sucrose solution) |
| <b>Food energy content (Kcal/g)</b>   | <b>3.9</b>  | <b>3.9</b>                        | <b>~ 4.5</b>                       |
| <b>Protein (% Kcal)</b>               | <b>20</b>   | <b>20</b>                         | <b>12</b>                          |
| <b>CHO (% Kcal)</b>                   | <b>68</b>   | <b>68</b>                         | <b>43</b>                          |
| of which sucrose (% CHO)              | --          | --                                | ~ 40                               |
| <b>Fat (% Kcal)</b>                   | <b>12</b>   | <b>12</b>                         | <b>45</b>                          |
| saturated fat (% fat)                 | 1.3         | 1.3                               | ~ 38                               |
| <b>Drink energy content (Kcal/mL)</b> | <b>--</b>   | <b>1.2</b>                        | <b>0.6</b>                         |

Abbreviations: %, percentage; CD, chow diet; CHO, carbohydrates; HSD, high-sugar diet; CAFD, cafeteria diet

**Table S2. Sequences statistics after pair-joining, demultiplexing length-filtering and 16rRNA pre-filtering, discriminated by sample**

| Sample | Number of reads | Length   |          | Number of bases | Ns |
|--------|-----------------|----------|----------|-----------------|----|
|        |                 | Mean     | SD       |                 |    |
| CD1    | 399253          | 289.8058 | 4.339368 | 117958213       | 0  |
| CD2    | 337421          | 289.7531 | 4.405118 | 99788070        | 0  |
| CD3    | 315032          | 289.7421 | 4.383879 | 92997067        | 0  |
| CD4    | 295921          | 289.6844 | 4.35879  | 87420970        | 0  |
| CD5    | 272286          | 289.5394 | 4.623917 | 80525836        | 0  |
| HSD1   | 261747          | 289.6338 | 4.473185 | 77338307        | 0  |
| HSD2   | 308018          | 289.7032 | 4.43724  | 91278805        | 0  |
| HSD3   | 281392          | 289.6942 | 4.423543 | 83257535        | 0  |
| HSD4   | 261540          | 289.7139 | 4.424959 | 77443709        | 0  |
| HSD5   | 268744          | 289.8103 | 4.234542 | 79184005        | 0  |
| HSD6   | 304374          | 289.8996 | 4.236857 | 90051233        | 0  |
| HSD7   | 333040          | 289.8521 | 4.293295 | 98790581        | 0  |
| HSD8   | 257364          | 289.6048 | 4.466156 | 75917576        | 0  |
| HSD9   | 241989          | 289.8426 | 4.352357 | 71638075        | 0  |
| CAFD1  | 284701          | 289.7622 | 4.337894 | 84081737        | 0  |
| CAFD2  | 248834          | 289.7758 | 4.324024 | 73350375        | 0  |
| CAFD3  | 279746          | 289.9536 | 4.122732 | 81910163        | 0  |
| CAFD4  | 293319          | 289.6203 | 4.339388 | 86127580        | 0  |
| CAFD5  | 292963          | 289.7252 | 4.329329 | 86163973        | 0  |
| CAFD6  | 248466          | 289.7277 | 4.300956 | 73081491        | 0  |
| CAFD7  | 262055          | 289.8382 | 4.222183 | 77221296        | 0  |
| CAFD8  | 285618          | 291.4155 | 2.048997 | 91632693        | 0  |
| CAFD9  | 300271          | 289.6989 | 4.331058 | 88398154        | 0  |

**Table S3. Gut microbial community by group**

| <b>Taxon</b>                                                                    | <b>CD<br/>(av. %)</b> | <b>HSD<br/>(av. %)</b> | <b>CAFD<br/>(av.%)</b> |
|---------------------------------------------------------------------------------|-----------------------|------------------------|------------------------|
| Archaea <sup>(1)</sup>                                                          | 0.0020                | 0.0003                 | 0                      |
| Firmicutes                                                                      | 74.4                  | 65.4                   | 49.8                   |
| (class Clostridia)                                                              | (93.7) <sup>(5)</sup> | (92) <sup>(5)</sup>    | (83) <sup>(5)</sup>    |
| Bacteroidetes <sup>(2)</sup>                                                    | 21                    | 30.7                   | 40.5                   |
| Verrucomicrobia (99.99% <i>Akkermansia</i> genus)                               | 2.05                  | 1.4                    | 4.71                   |
| Tenericutes/ class Mollicutes                                                   | 1.7                   | 0.8                    | 0.5                    |
| Proteobacteria                                                                  | 0.23                  | 0.96                   | 3.1                    |
| (class Gammaproteobacteria)                                                     | 0.03001               | 0.10633                | 0.77423                |
| (order Enterobacteriales)                                                       | 0.00948               | 0.08693                | 0.31387                |
| Saccharibacteria                                                                | 0.229                 | 0.132                  | 0.067                  |
| order Gastranaerophilales                                                       | 0.074                 | 0.164                  | 0.874                  |
| <b>class Mollicutes/order RF39<sup>(1)</sup></b>                                | <b>1.282</b>          | <b>0.708</b>           | <b>0.255</b>           |
| ord. Bacillales <sup>(1)</sup>                                                  | 0.47                  | 0.03061                | 0.20432                |
| fam. Planococcaceae <sup>(1)</sup>                                              | 0.01487               | 0.00029                | 0.00063                |
| genus <i>Lysinibacillus</i> <sup>(1)</sup>                                      | 0.00020               | 0                      | 0                      |
| genus <i>Planomicrobium</i> <sup>(1)</sup>                                      | 0.00531               | 0                      | 0.00004                |
| (fam. Bacillaceae) <i>Bacillus aerius</i> <sup>(2)</sup>                        | 0.00018               | 0                      | 0.00004                |
| Synergistaceae <sup>(1)</sup>                                                   | 0.00067               | 0.00024                | 0.00011                |
| unc. <i>Pyramidobacter</i> sp. <sup>(1)</sup>                                   | 0.00013               | 0                      | 0                      |
| <i>Thermanaerovibrio acidaminovorans</i> <sup>(1)</sup>                         | 0.00013               | 0                      | 0                      |
| fam. Cyclobacteriaceae /genus <i>Algoriphagus</i> <sup>(1)</sup>                | 0.00018               | 0                      | 0                      |
| fam. Desulfomicrobiaceae / genus <i>Desulfomicrobium</i> <sup>(1)</sup>         | 0.00051               | 0                      | 0                      |
| fam. Syntrophorhabdaceae / genus <i>Syntrophorhabdus</i> <sup>(1)</sup>         | 0.00013               | 0                      | 0                      |
| fam. Oceanospirillaceae / unc. species of <i>Marinobacterium</i> <sup>(1)</sup> | 0.00018               | 0                      | 0                      |
| fam. Spongibacteraceae / genus <i>Zhongshania</i> <sup>(1)</sup>                | 0.00034               | 0                      | 0                      |
| genus <i>Leptolyngbya</i> <sup>(1)</sup>                                        | 0.00019               | 0                      | 0                      |
| genus "Lachnospiraceae NC2004" <sup>(1)</sup>                                   | 0.011                 | 0.003                  | 0.008                  |
| genus "Lachnospiraceae UCG-004" <sup>(1)</sup>                                  | 0.0289                | 0.0301                 | 0.0258                 |
| genus <i>C. Cloacimonas</i> <sup>(1)</sup>                                      | 0.00011               | 0                      | 0                      |
| <b>unc. <i>Prevotella</i><sup>(1)</sup></b>                                     | <b>0.00094</b>        | <b>0.00081</b>         | <b>0.00145</b>         |
| unc. <i>Arcobacter</i> <sup>(1)</sup>                                           | 0.00062               | 0                      | 0                      |
| genus <i>Mogibacterium</i> <sup>(1)</sup>                                       | 0.00160               | 0.00076                | 0.00053                |
| genus <i>Flavonifractor</i> <sup>(1)</sup>                                      | 0.00288               | 0.00246                | 0.00146                |
| unc. species of <i>Pseudoflavonifractor</i> <sup>(1)</sup>                      | 0.00037               | 0.00008                | 0.00048                |
| genus <i>Megasphaera</i> <sup>(1)</sup>                                         | 0.00086               | 0.00050                | 0.00028                |
| <b>genus <i>Parvibacter</i><sup>(1)</sup></b>                                   | <b>0.00231</b>        | <b>0.00046</b>         | <b>0.00108</b>         |
| <b>genus <i>Senegalimassilia</i><sup>(1)</sup></b>                              | <b>0.01144</b>        | <b>0.00393</b>         | <b>0.00225</b>         |
| <i>Thermanaerovibrio acidaminovorans</i> <sup>(1)</sup>                         | 0.00013               | 0                      | 0                      |
| unc. <i>Pyramidobacter</i> <sup>(1)</sup>                                       | 0.00013               | 0                      | 0                      |
| fam. Desulfovibrionaceae / genus <i>Bilophila</i>                               | 0.0182                | 0.0619                 | 0.3228                 |
|                                                                                 |                       |                        |                        |
| fam. Peptococcaceae <sup>(2)</sup>                                              | 0.61250               | 0.33287                | 0.30818                |
| genus <i>Aerococcus</i> <sup>(2)</sup>                                          | 0.00024               | 0.00004                | 0.00011                |
| genus <i>Subdoligranulum</i> <sup>(2)</sup>                                     | 0.00077               | 0.00041                | 0.00039                |
| Thiotricaceae / unc. <i>Thiothrix</i> <sup>(2)</sup>                            | 0.00018               | 0.00032                | 0.00012                |
| genus " <i>Selenomonas</i> 1" <sup>(2)</sup>                                    | 0.00130               | 0.00206                | 0.00160                |
|                                                                                 |                       |                        |                        |
| unc. <i>Nistropira</i> <sup>(3)</sup>                                           | 0.00054               | 0.00016                | 0                      |
| unc. <i>Parvibaculum</i> <sup>(3)</sup>                                         | 0.00021               | 0.00027                | 0                      |
| unc. Halothiobacillaceae <sup>(3)</sup>                                         | 0.00023               | 0.00033                | 0.00004                |
| unc. <i>Actinobacillus</i> <sup>(3)</sup>                                       | 0.00024               | 0.00004                | 0                      |

|                                                      |         |         |         |
|------------------------------------------------------|---------|---------|---------|
| genus "Succinivibrionaceae UCG_001" <sup>(3)</sup>   | 0.00017 | 0.00016 | 0       |
| <i>Pseudobutyrvibrio</i> <sup>(3)</sup>              | 0.00067 | 0.00054 | 0       |
| unc. "Lachnospiraceae UCG-001" <sup>(3)</sup>        | 0.42251 | 0.70699 | 0.31723 |
| unc. <i>Caproiciproducens</i> <sup>(3)</sup>         | 0.00032 | 0.00008 | 0       |
| unc. "Ruminococcaceae UCG-007" <sup>(3)</sup>        | 0.00187 | 0.00084 | 0.00055 |
| <i>Pseudoramibacter alactolyticus</i> <sup>(3)</sup> | 0.00012 | 0.00007 | 0       |
| unc. <i>Acidaminococcus</i> <sup>(3)</sup>           | 0.00017 | 0.00021 | 0       |
| genus "Prevotella 2" <sup>(3)</sup>                  | 0.00011 | 0.00028 | 0.00051 |
| genus "Ruminococcaceae NK4A214" <sup>(3) (4)</sup>   | 0.43109 | 0.23470 | 0.29703 |
| genus <i>Rhizobium</i> <sup>(3) (4)</sup>            | 0       | 0.00026 | 0.00207 |
|                                                      |         |         |         |
| <b>genus <i>Oscillibacter</i></b> <sup>(4)</sup>     | 1.14851 | 0.85943 | 0.81998 |
| genus <i>Geobacillus</i> <sup>(4)</sup>              | 0.00006 | 0.00063 | 0       |
| Chloroflexi/order S085 unc. genus <sup>(4)</sup>     | 0       | 0.00043 | 0       |
| <b>genus <i>Barnesiella</i></b> <sup>(4)</sup>       | 0.07500 | 0.15109 | 0.05021 |
| unc. "Lachnospiraceae UCG-010" <sup>(4)</sup>        | 0.00451 | 0.00282 | 0.00449 |

Index <sup>(1)</sup> marks taxa that were found having LDA discriminant capacity between chow diet (CD) and the 2 unhealthy dietary treatments; <sup>(2)</sup> discriminant between CD and HSD; <sup>(3)</sup> discriminant between CD and CAFD; and <sup>(4)</sup> discriminant between HSD and CAFD. <sup>(5)</sup> expressed as percentage of the Firmicutes. unc. = uncultured
